# Supplementary material
Source: PubMed Central journal article supplement (PMC9746931)
Supplement: mmc3.pdf [file mmc3.pdf]

**Score**      **Sounds and noises**

- 1 natural ambient sounds: waves, birds, wind
- 2 natural ambient sounds, and human sounds (conversations, singing, screaming, laughing)
- 3 natural, human ambient sound and amplified music with speakers
- 4 natural and human ambient sound, amplified music and / or machinery: vehicles, motorcycles, trucks, combustion electricity generators
- 5 combination of any of the above with noise from constructions, industries, airports

**Score**      **Odors**

- 1 Not perceptible, only natural associated to the sea and living vegetation (excludes decomposition of macroalgae or animals)
- 2 Slight odors of substances for personal use such as sunscreens, repellants, perfumes, tobacco smoke are perceived
- 3 Moderate odors from food eaten or cooked on the beach, smoke from campfires, grills, food vendors, vehicle emissions
- 4 Intense odors from residues, waste, emissions from vehicles, hotel facilities, fish collection centers are perceived
- 5 Intense sewage odors, decomposition of macroalgae or animal tops, industries, refineries

**Score**      **Litter**

- 1 Few or absent
- 2 Dispersed
- 3 Frequent
- 4 Accumulated
- 5 Litter (dispersed, frequent, or accumulated) plus biohazard and cytotoxic wastes

**Score**      **Human activities on weekends**

- 1 None or sporadic
- 2 Few users: tourists, or maintenance personnel, surveillance, without facilities in rest area
- 3 Many users: tourists, cleaning and maintenance personnel, with facilities in rest area
- 4 In addition to users, sporadic presence of off-road vehicles
- 5 In addition to users, constant presence of off-road vehicles

**Score**      **Biological traits**

- 1 Widespread presence of dune vegetation, presence of wildlife (reptiles, mammals, birds), coastal crustaceans (Ghost crab, coconut tree, blue crab, others), turtle nests
- 2 Restricted presence of dune vegetation, presence of wildlife (reptiles, mammals, birds), coastal crustaceans (ghost crab, coconut tree, blue crab, others) or turtle nests
- 3 Absence of dune vegetation, decrease in wildlife, coastal crustaceans, looting of nests. Presence of opportunistic fauna
- 4 Absence of dune vegetation, absence of wildlife, little presence of coastal crustaceans, looting of nests. Remarkable domain of opportunistic fauna
- 5 Absence of all the biological features of beaches in natural conditions
