# Supplementary material
Source: PubMed Central journal article supplement (PMC9746931)
Supplement: mmc4.pdf [file mmc4.pdf]

| <b>Beach</b> | <b>Zone</b> | <b>Species</b>          | <b>Category</b>       |
|--------------|-------------|-------------------------|-----------------------|
| Itapua       | Rest        | Ocypode quadrata        | Crabs species         |
| Itapua       | Services    | Tropidurus sp           | Reptiles species      |
| Itapua       | Services    | Columba livia           | Opportunistic species |
| Itapua       | Services    | Passer domesticus       | Opportunistic species |
| Itapua       | Services    | Mimus gilvus            | Wildlife species      |
| Itapua       | Services    | Fluvicola nengeta       | Wildlife species      |
| Itapua       | Services    | Coereba flaveola        | Wildlife species      |
| Itapua       | Services    | Tangara palmarum        | Wildlife species      |
| Itapua       | Services    | Tyrannus melancholicus  | Wildlife species      |
| Itapua       | Services    | Cocos nucifera          | Plant species         |
| Itapua       | Services    | Terminalia catappa      | Plant species         |
| Itapua       | Services    | sand grass              | Plant species         |
| Itapua       | Services    | Opuntia littoralis.     | Plant species         |
| Ribeira      | Services    | Tropidurus sp           | Reptiles species      |
| Ribeira      | Services    | Columba livia           | Opportunistic species |
| Ribeira      | Services    | Dogs                    | Domestic species      |
| Ribeira      | Services    | Mimus gilvus            | Wildlife species      |
| Ribeira      | Services    | Fluvicola nengeta       | Wildlife species      |
| Ribeira      | Services    | Coereba flaveola        | Wildlife species      |
| Ribeira      | Services    | Tangara palmarum        | Wildlife species      |
| Ribeira      | Services    | Tyrannus melancholicus  | Wildlife species      |
| Ribeira      | Services    | Cocos nucifera          | Plant species         |
| Ribeira      | Services    | Terminalia catapa.      | Plant species         |
| La Estrella  | Services    | Leiocephalus carinatus  | Reptiles species      |
| La Estrella  | Services    | Terminalia catappa      | Plant species         |
| La Estrella  | Services    | Coccoloba uvifera       | Plant species         |
| La Estrella  | Services    | Dichrostachys cinerea   | Plant species         |
| La Estrella  | Services    | Peltophorum pterocarpum | Plant species         |
| Playa Dulce  | Rest        | Convolvulus maritimus   | Plant species         |
| Playa Dulce  | Rest        | Ipomea pes-caprae       | Plant species         |
| Playa Dulce  | Rest        | Panicum maximum         | Plant species         |

|           |          |                        |                                    |
|-----------|----------|------------------------|------------------------------------|
| Chelem    | Rest     | Ocypode quadrata       | Crabs species                      |
| Chelem    | Rest     | Cakile edentula        | Plant species                      |
| Ribeira   | Rest     | Columba livia          | Opportunistic species              |
| Ribeira   | Rest     | Dogs                   | Domestic species                   |
| Chelem    | Services | Coccoloba uvifera      | Plant species                      |
| Chelem    | Services | Cocos nucifera         | Plant species                      |
| Chelem    | Active   | red algae              | Wrack species                      |
| Chelem    | Active   | Phalacrocorax sp       | Seabird species                    |
| Chelem    | Active   | Leucophaeus atricilla  | Seabird species                    |
| Veracruz  | Services | Turtle Nests           | Reptiles species                   |
| Veracruz  | Services | Leucophaeus atricilla  | Seabird species                    |
| Veracruz  | Services | Onychoprion anaethetus | Seabird species                    |
| Veracruz  | Services | Dogs                   | Domestic species                   |
| Veracruz  | Services | Fluvicola nengeta      | Wildlife species                   |
| Veracruz  | Services | Coereba flaveola       | Wildlife species                   |
| Veracruz  | Services | Pitangus sulphuratus   | Wildlife species                   |
| Veracruz  | Services | Legatus leucophaeus    | Wildlife species                   |
| Veracruz  | Services | Tachycineta leucorhoa  | Wildlife species                   |
| Veracruz  | Services | Cakile edentula        | Plant species                      |
| Veracruz  | Services | Ipomoea pes-caprae     | Plant species                      |
| Veracruz  | Services | Distichlis spicata     | Plant species                      |
| Chicxulub | Rest     | red algae              | Wrack species                      |
| Chicxulub | Rest     | Turtle nests           | Reptiles species                   |
| Chicxulub | Rest     | Phalacrocorax sp       | Seabird species                    |
| Siboney   | Services | Leiocephalus carinatus | Reptiles species                   |
| Siboney   | Services | Larus delawarensis     | Seabird species                    |
| Siboney   | Services | Phalacrocorax sp       | Seabird species                    |
| Siboney   | Services | Dives atrovioleacea    | Opportunistic species endemic cuba |
| Siboney   | Services | Mimus poliglottos      | Opportunistic species              |
| Siboney   | Services | Passer domesticus      | Opportunistic species              |
| Siboney   | Services | Cathartes aura         | Opportunistic species              |

|                       |          |                           |                       |
|-----------------------|----------|---------------------------|-----------------------|
| Siboney               | Services | Horses                    | Domestic species      |
| Siboney               | Services | Dogs                      | Domestic species      |
| Siboney               | Services | Coccoloba uvifera         | Plant species         |
| Siboney               | Services | Coconut palm              | Plant species         |
| Siboney               | Services | Terminalia catappa        | Plant species         |
| Siboney               | Services | Conocarpus erectus        | Plant species         |
| Siboney               | Services | Pedilanthus tithymaloides | Plant species         |
| Siboney               | Services | Panicum maximum           | Plant species         |
| Siboney               | Services | Borrchia arborescens      | Plant species         |
| Gorgona               | Active   | Grackles                  | Opportunistic species |
| Gorgona               | Active   | Xanthidae                 | Crabs species         |
| Gorgona               | Active   | Ocypode quadrata          | Crabs species         |
| Gorgona               | Active   | Callinectes sapidus       | Crabs species         |
| Itapua                | Active   | Larus sp                  | Seabird species       |
| Itapua                | Active   | Columba livia             | Opportunistic species |
| Itapua                | Active   | Ocypode quadrata          | Crabs species         |
| Itapua                | Active   | Fluvicola nengeta         | Wildlife species      |
| Balneario de Carolina | Active   | Haematopus palliatus      | Seabird species       |
| Balneario de Carolina | Active   | Quiscalus niger           | Opportunistic species |
| Balneario de Carolina | Active   | Ocypode quadrata          | Crabs species         |
| Balneario de Carolina | Active   | Cocos nucifera            | Plant species         |
| Balneario de Carolina | Active   | Terminalia catappa        | Plant species         |
| Chicxulub             | Active   | red algae                 | Wrack species         |
| Chicxulub             | Active   | Leucophaeus atricilla     | Seabird species       |
| Chicxulub             | Active   | Onychoprion anaethetus    | Seabird species       |
| Balneario de Carolina | Active   | Thespesia populnea        | Plant species         |
| Balneario de Carolina | Rest     | Nyctanassa violacea       | Seabird species       |
| Balneario de Carolina | Rest     | Ocypode quadrata          | Crabs species         |
| Balneario de Carolina | Rest     | Coccoloba uvifera         | Plant species         |
| El Escambron          | Rest     | Columba livia             | Opportunistic species |
| El Escambron          | Services | Columba livia             | Opportunistic species |

|                       |          |                        |                       |
|-----------------------|----------|------------------------|-----------------------|
| El Escambron          | Services | Quiscalus niger        | Opportunistic species |
| El Escambron          | Services | Myiopsitta monachus    | Opportunistic species |
| El Escambron          | Services | Pelecanus occidentalis | Opportunistic species |
| El Escambron          | Services | Cocos nucifera         | Plant species         |
| El Escambron          | Services | Terminalia catappa     | Plant species         |
| El Escambron          | Services | Casuarina sp.          | Plant species         |
| El Escambron          | Services | Thespesia populnea     | Plant species         |
| El Escambron          | Services | Chrysobalanus icaco    | Plant species         |
| Ribeira               | Active   | Fregata magnificens    | Seabird species       |
| Ribeira               | Active   | Thalasseus acuflavidus | Seabird species       |
| Ribeira               | Active   | Columba livia          | Opportunistic species |
| Ribeira               | Active   | Ocypode quadrata       | Crabs species         |
| Ribeira               | Active   | Dogs                   | Domestic species      |
| Ribeira               | Active   | Fluvicola nengeta      | Wildlife species      |
| Balneario de Carolina | Rest     | Cocos nucifera         | Plant species         |
| Balneario de Carolina | Services | Gecarcinus lateralis   | Crabs species         |
| Balneario de Carolina | Services | Cassuarina sp.         | Plant species         |
| Balneario de Carolina | Services | Terminalia catappa     | Plant species         |
| Balneario de Carolina | Services | Coccoloba uvifera      | Plant species         |
| Balneario de Carolina | Services | Cocos nucifera         | Plant species         |
| La Estrella           | Active   | Sargassum fluitans     | Wrack species         |
| La Estrella           | Active   | Thalassia testudinum   | Wrack species         |
| La Estrella           | Active   | Clodophora rupestris   | Wrack species         |
| La Estrella           | Active   | Ameiva ameiva          | Reptiles species      |
| La Estrella           | Active   | Grackles               | Opportunistic species |
| La Estrella           | Active   | Parrots                | Opportunistic species |
| La Estrella           | Active   | Ocypode quadrata       | Crabs species         |
| La Estrella           | Active   | Dogs                   | Domestic species      |
| La Estrella           | Active   | palm trees             | Plant species         |
| Gorgona               | Services | Ctenosaura similis     | Reptiles species      |
| Gorgona               | Services | Grackles               | Opportunistic species |

|                |          |                            |                       |
|----------------|----------|----------------------------|-----------------------|
| Gorgona        | Services | Parrots                    | Opportunistic species |
| Gorgona        | Services | Ocypode quadrata           | Crabs species         |
| Gorgona        | Services | Dogs                       | Domestic species      |
| Gorgona        | Services | Cocos nucifera             | Plant species         |
| Gorgona        | Services | almond trees               | Plant species         |
| Gorgona        | Services | red mangrove               | Plant species         |
| Chabelita      | Services | Ammophila arenaria         | Plant species         |
| Chabelita      | Rest     | Ammophila arenaria         | Plant species         |
| Chuburna       | Active   | Phalacrocorax sp           | Seabird species       |
| Chuburna       | Active   | Leucophaeus atricilla      | Seabird species       |
| Chuburna       | Active   | Ocypode quadrata           | Crabs species         |
| Playa Caracas  | Rest     | Charadrius wilsonia        | Seabird species       |
| Playa Caracas  | Rest     | Leucophaeus atricilla      | Opportunistic species |
| Playa Caracas  | Rest     | Ipomea pes-caprae          | Plant species         |
| Playa Caracas  | Rest     | Tornefortia gnaphalide     | Plant species         |
| Playa Caracas  | Rest     | Stachytarpheta jamaicensis | Plant species         |
| Playa Caracas  | Rest     | Poaceae spp.               | Plant species         |
| Playa Caracas  | Rest     | Acasita tortuosa           | Plant species         |
| Playa Caracas  | Rest     | Borrichia arborescens      | Plant species         |
| Playa Caracas  | Rest     | Suriana maritima           | Plant species         |
| Playa Caracas  | Rest     | Batis maritima             | Plant species         |
| Playa Caracas  | Active   | Charadrius wilsonia        | Seabird species       |
| Playa Caracas  | Active   | Plecanus occidentalis      | Seabird species       |
| Playa Caracas  | Active   | Ocypode quadrata           | Crabs species         |
| Playa Caracas  | Active   | Ipomea sp.                 | Plant species         |
| Porto da Barra | Active   | Columba livia              | Opportunistic species |
| Porto da Barra | Active   | Fluvicola nengeta          | Wildlife species      |
| Malecon        | Rest     | Fregata magnificens        | Seabird species       |
| El turista     | Active   | algae                      | Wrack species         |
| El turista     | Active   | Frigatebirds               | Seabird species       |
| El turista     | Active   | Oystercatchers             | Seabird species       |

|                          |          |                       |                       |
|--------------------------|----------|-----------------------|-----------------------|
| El turista               | Active   | Ocypode quadrata      | Crabs species         |
| Paseo Shopping           | Services | Dogs                  | Domestic species      |
| El Estero Santa Catalina | Active   | Grackles              | Opportunistic species |
| El Estero Santa Catalina | Active   | Dogs                  | Domestic species      |
| Chabelita                | Active   | Ardea alba            | Seabird species       |
| Chuburna                 | Services | Ctenosaura sp         | Reptiles species      |
| Chuburna                 | Services | Coccoloba uvifera     | Plant species         |
| Hilton Playa del Carmen  | Rest     | Larus delawarensis    | Seabird species       |
| Hilton Playa del Carmen  | Rest     | ornamental vegetation | Plant species         |
| Varadero                 | Rest     | Fregata magnificens   | Seabird species       |
| Varadero                 | Rest     | Pigeons               | Opportunistic species |
| Varadero                 | Rest     | Dogs                  | Domestic species      |
| Principal Arboletes      | Active   | Frigatebirds          | Seabird species       |
| Hilton Playa del Carmen  | Active   | green algae           | Wrack species         |
| Hilton Playa del Carmen  | Active   | Larus delawarensis    | Seabird species       |
| Hilton Playa del Carmen  | Active   | Phalacrocorax sp      | Seabird species       |
| Hilton Playa del Carmen  | Active   | Dogs                  | Domestic species      |
| Varadero                 | Active   | Fregata magnificens   | Seabird species       |
| La Estrella              | Rest     | Clodophora rupestris  | Wrack species         |
| La Estrella              | Rest     | Larus delawarensis    | Seabird species       |
| La Estrella              | Rest     | palm trees            | Plant species         |
| Mamitas Beach            | Active   | red algae             | Wrack species         |
| Mamitas Beach            | Active   | Larus delawarensis    | Seabird species       |
| Mamitas Beach            | Active   | Phalacrocorax sp      | Seabird species       |
| Mamitas Beach            | Active   | Ocypode quadrata      | Crabs species         |
| El Estero Santa Catalina | Rest     | palm trees            | Plant species         |
| Mamitas Beach            | Rest     | Ocypode quadrata      | Crabs species         |
| Mamitas Beach            | Rest     | ornamental vegetation | Plant species         |
| Playa Langosta           | Active   | Larus sp              | Seabird species       |
| Malecon                  | Active   | Dogs                  | Domestic species      |
| Mamitas Beach            | Services | Quiscalus mexicanus   | Opportunistic species |

|                |          |                            |                       |
|----------------|----------|----------------------------|-----------------------|
| Mamitas Beach  | Services | ornamental vegetation      | Plant species         |
| Playa Delfines | Services | Ctenosaura sp              | Reptiles species      |
| Playa Delfines | Services | Quiscalus mexicanus        | Opportunistic species |
| Playa Delfines | Services | Coccoloba uvifera          | Plant species         |
| Playa Delfines | Services | ornamental vegetation      | Plant species         |
| Playa Delfines | Rest     | Turtle nests               | Reptiles species      |
| Playa Delfines | Rest     | Cocos nucifera             | Plant species         |
| Playa Delfines | Rest     | Cakile edentula            | Plant species         |
| Playa Delfines | Rest     | Ipomoea pes-caprae         | Plant species         |
| Playa Delfines | Rest     | Distichlis spicata         | Plant species         |
| Playa Langosta | Services | Quiscalus mexicanus        | Opportunistic species |
| Playa Langosta | Services | ornamental vegetation      | Plant species         |
| Playa Langosta | Rest     | Sargassum                  | Wrack species         |
| Playa Langosta | Rest     | Dogs                       | Domestic species      |
| Playa Marlin   | Rest     | Turtle nests               | Reptiles species      |
| Playa Marlin   | Rest     | Quiscalus mexicanus        | Opportunistic species |
| Progreso       | Services | Quiscalus mexicanus        | Opportunistic species |
| Progreso       | Services | Cocos nucifera             | Plant species         |
| Progreso       | Services | Cakile edentula            | Plant species         |
| Progreso       | Services | Ipomoea pes-caprae         | Plant species         |
| Progreso       | Services | Distichlis spicata         | Plant species         |
| El Pescador    | Active   | Leucophaeus atricilla      | Seabird species       |
| Progreso       | Active   | Syringodium                | Wrack species         |
| Progreso       | Active   | Leucophaeus atricilla      | Seabird species       |
| Playa Caracas  | Services | Turtle Nests               | Reptiles species      |
| Playa Caracas  | Services | Pholidoscelis exsul        | Reptiles species      |
| Playa Caracas  | Services | Leucophaeus atricilla      | Opportunistic species |
| Playa Caracas  | Services | Horses                     | Domestic species      |
| Playa Caracas  | Services | Poaceae sp                 | Plant species         |
| Playa Caracas  | Services | Ipomoea pes-caprae         | Plant species         |
| Playa Caracas  | Services | Stachytarpheta jamaicensis | Plant species         |

|                          |          |                       |                       |
|--------------------------|----------|-----------------------|-----------------------|
| Playa Caracas            | Services | Cocos nucifera        | Plant species         |
| Playa Caracas            | Services | Acasia tortuosa       | Plant species         |
| Playa Caracas            | Services | Cocolova uvifera      | Plant species         |
| Playa Caracas            | Services | Borrichia arborescens | Plant species         |
| Playa Caracas            | Services | Dodonaea viscosa      | Plant species         |
| Progreso                 | Rest     | Cakile edentula       | Plant species         |
| Sisal                    | Active   | Larus sp              | Seabird species       |
| Sisal                    | Active   | Quiscalus mexicanus   | Opportunistic species |
| Sisal                    | Active   | Ocypode quadrata      | Crabs species         |
| Porto da Barra           | Services | Dogs                  | Domestic species      |
| Sisal                    | Services | Dogs                  | Domestic species      |
| Sisal                    | Services | Cocos nucifera        | Plant species         |
| Sisal                    | Services | Cakile edentula       | Plant species         |
| Sisal                    | Services | Ipomoea pes-caprae    | Plant species         |
| Sisal                    | Services | Distichlis spicata    | Plant species         |
| El Estero Santa Catalina | Services | Ocypode quadrata      | Crabs species         |
| El Estero Santa Catalina | Services | Dogs                  | Domestic species      |
| Siboney                  | Rest     | Sargassum fluitans    | Wrack species         |
| Siboney                  | Rest     | Dogs                  | Domestic species      |
| Siboney                  | Rest     | Thistles              | Plant species         |
| El Escambron             | Active   | Columba livia         | Opportunistic species |
| El Escambron             | Active   | Ocypode quadrata      | Crabs species         |
| El Escambron             | Active   | Valonia sp.           | Plant species         |
| Gorgona                  | Rest     | Leucophaeus atricilla | Seabird species       |
| Gorgona                  | Rest     | Fregata magnificens   | Seabird species       |
| Gorgona                  | Rest     | ornamental vegetation | Plant species         |
| Sisal                    | Rest     | Ocypode quadrata      | Crabs species         |
| Malecon                  | Services | Ammophila arenaria    | Plant species         |
