# Supplementary material
Source: PubMed Central journal article supplement (PMC9746931)
Supplement: mmc5.pdf [file mmc5.pdf]

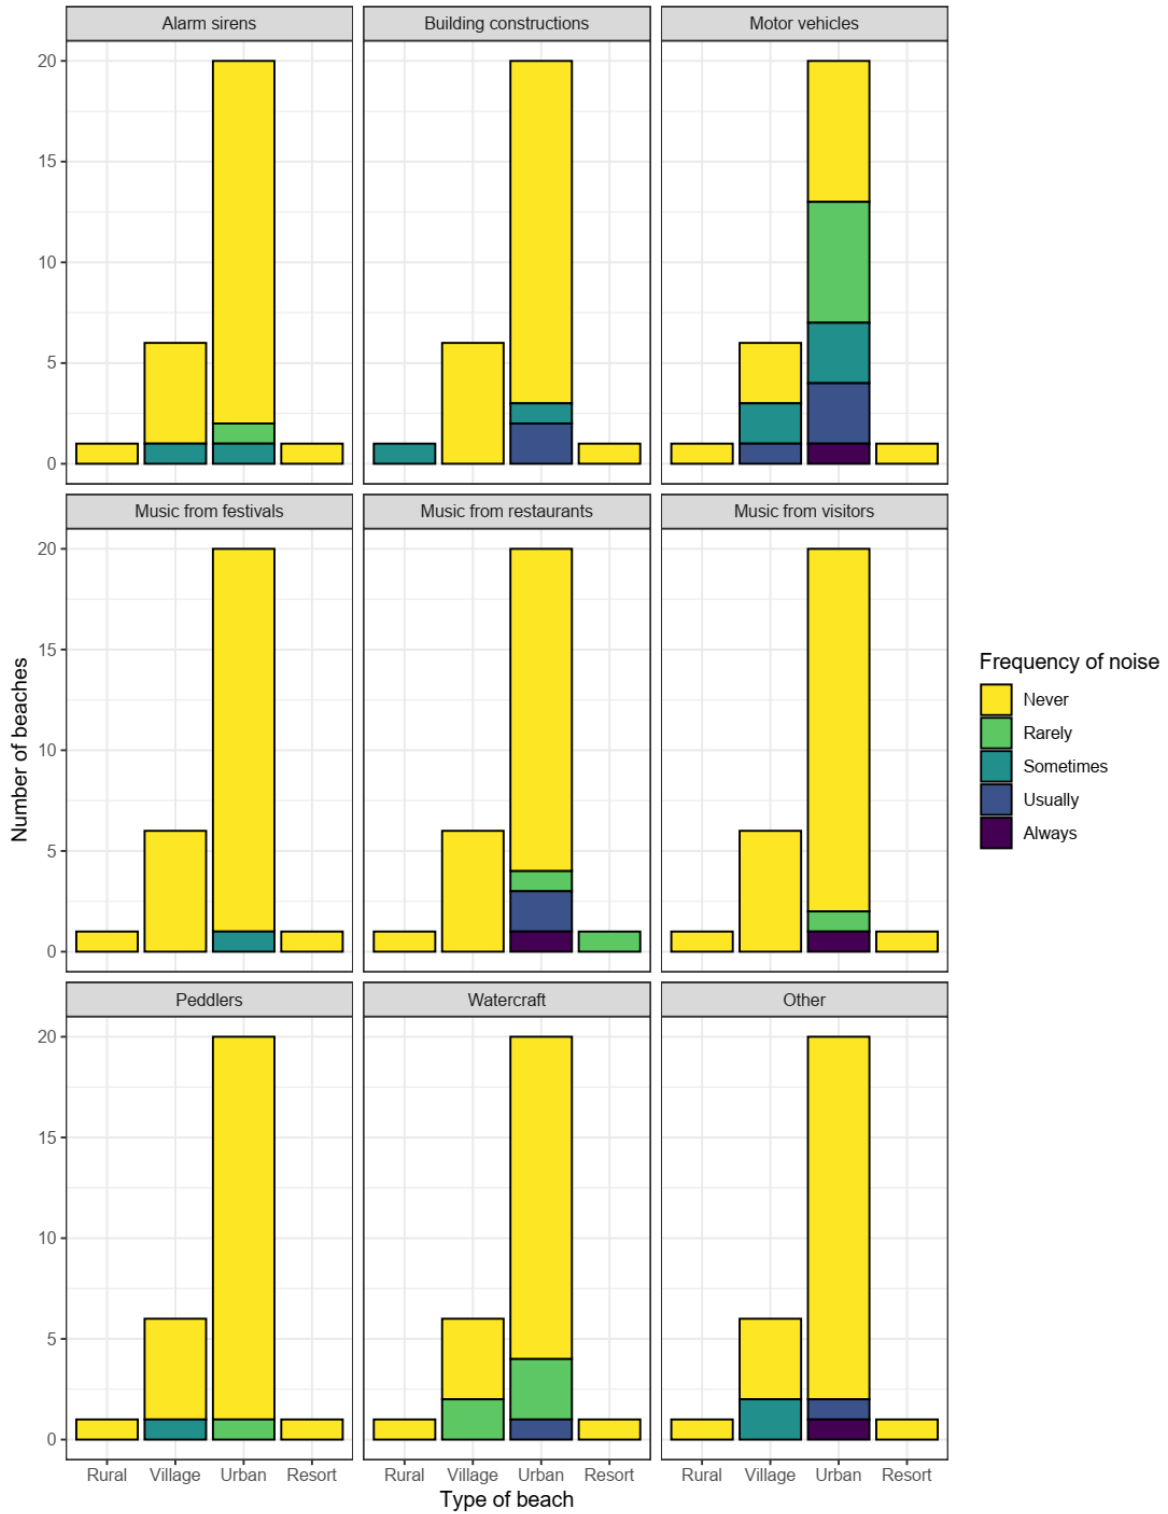

Supplementary 5.1. Noise sources and frequency of perception in 29 recreational beaches in Latin America during the confinement of COVID 19

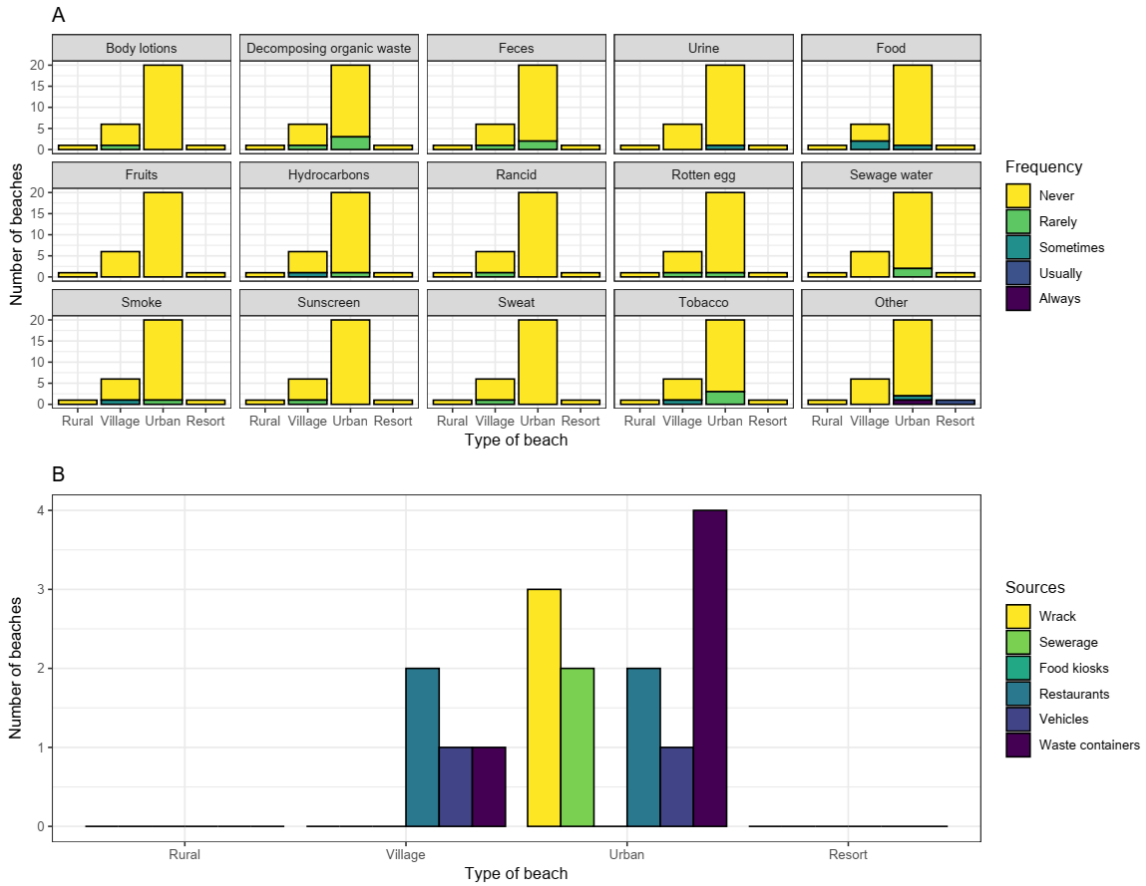

Supplementary 5.2. Odors and potential sources reported in 29 recreational beaches in Latin America during the confinement of COVID 19. In A, the number of beaches registering any of the frequency of perception of odors. In B, the frequency of beaches registering any of the potential sources of odors.

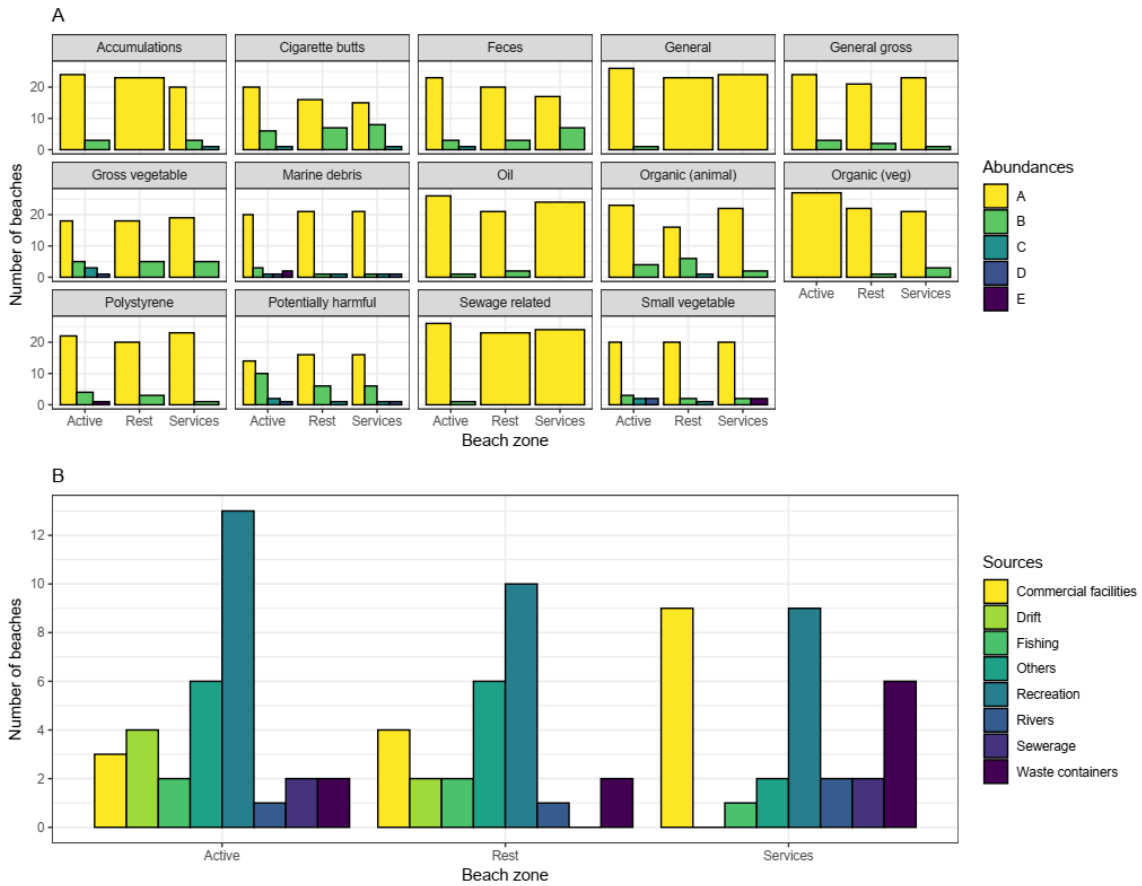

Supplementary 5.3. Litter and potential sources reported in 29 recreational beaches in Latin America during the confinement of COVID 19. (In A, the frequency of beaches registering any of the abundance categories (Botero et al., in preparation) according to the beach zone, where A: absence and E: maximum abundance. In B, the frequency of beaches registering any potential sources of litter for each beach zone.)

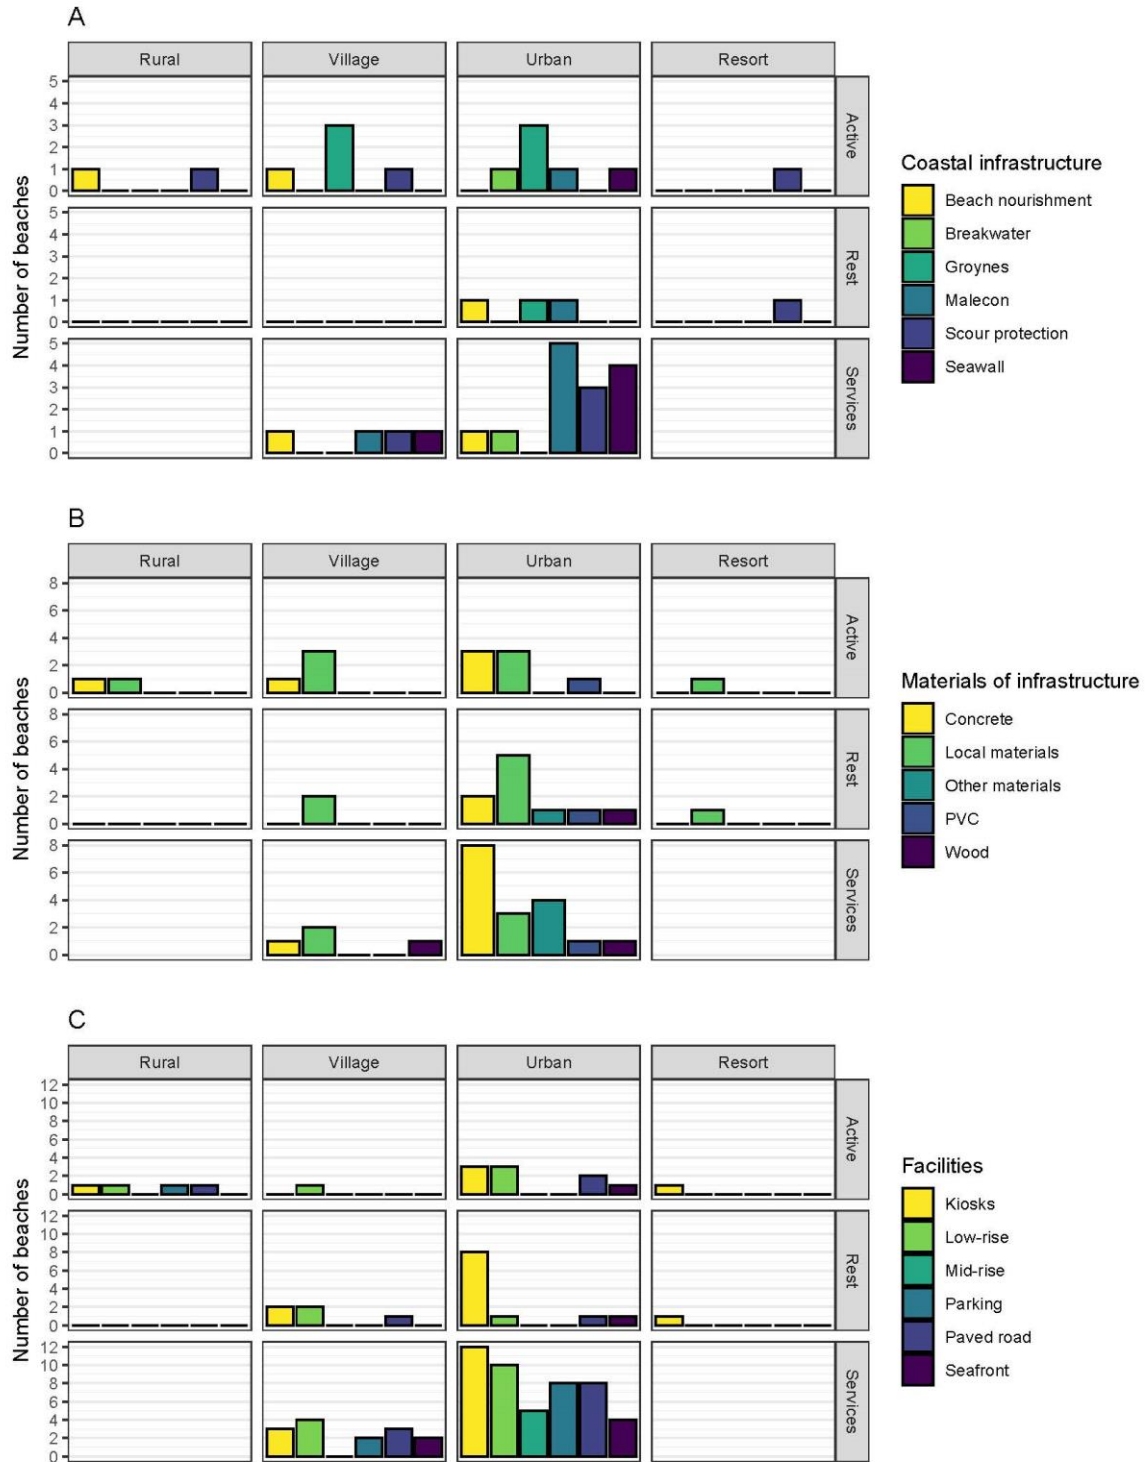

Supplementary 5.4. Infrastructure, materials and facilities reported in 29 recreational beaches in Latin America during the confinement of COVID 19. Values are shown by type of beach

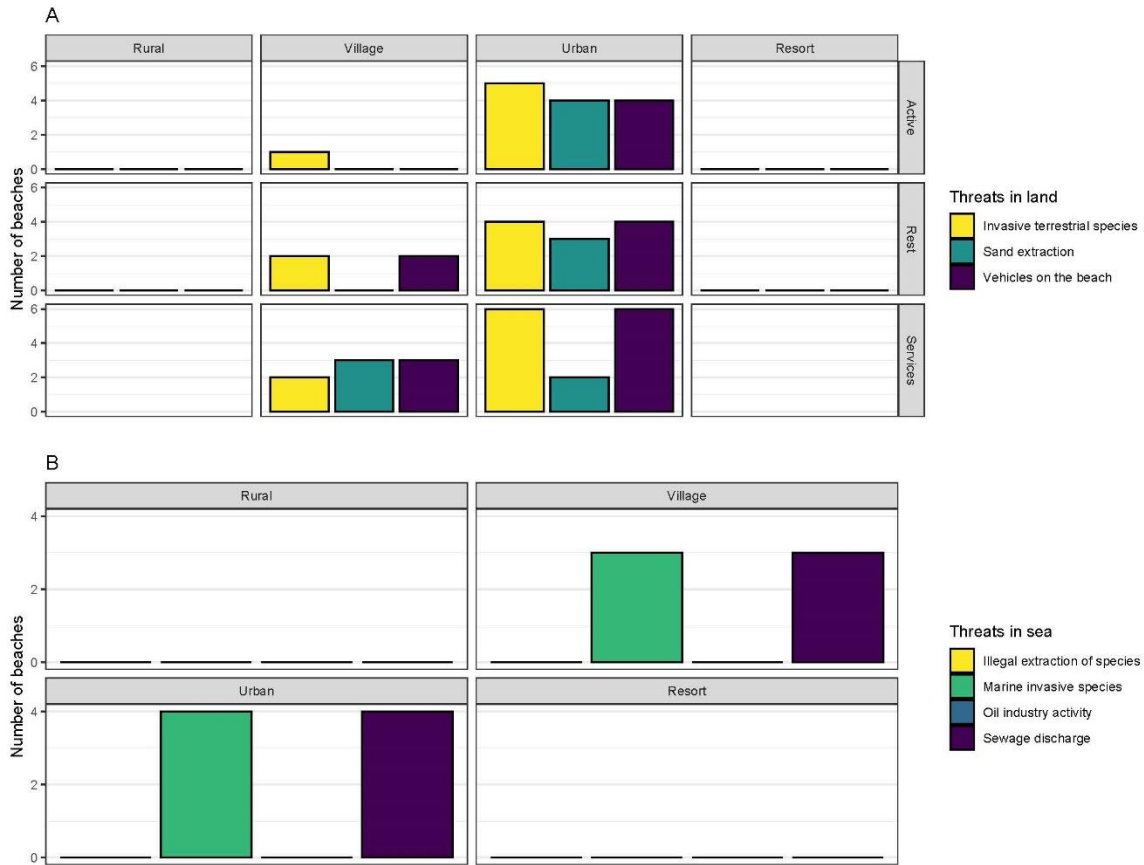

Supplementary 5.5. Anthropogenic threats in land and sea reported in 29 recreational beaches in Latin America during the confinement of COVID 19. Values are shown by type of beach
